# Supplementary material for: Analysis of the Fecal Metabolomic Profile in Breast vs. Different Formula Milk Feeding in Late Preterm Infants
Source: MDPI journal article supplement (doi:10.3390/metabo14010072), 2024-01-22
Supplement: s1 [file s1]

# Analysis of the Fecal Metabolomic Profile in Breast vs. Different Formula Milk Feeding in Late Preterm Infants

Giuseppe De Bernardo <sup>1,\*</sup>, Gilda D'Urso <sup>2</sup>, Simona Spadarella <sup>1</sup>, Maurizio Giordano <sup>3</sup>, Giuseppina Leone <sup>1</sup> and Agostino Casapullo <sup>2,\*</sup>

<sup>1</sup> Division of Pediatrics Neonatology and NICU, Ospedale Buon Consiglio Fatebenefratelli, 80123 Naples, Italy; spadarella.simona@fbfna.it (S.S.); leone.giuseppina@fbfna.it (G.L.)

<sup>2</sup> Department of Pharmacy, University of Salerno, via Giovanni Paolo II, 132, 84084, Fisciano, Italy; gidurso@unisa.it

<sup>3</sup> Department of Clinical Medicine and Surgery, Federico II University, 80138 Naples, Italy; mauri.giordano@studenti.unina.it

\* Correspondence: debernardo.giuseppe@fbfna.it (G.D.B.); casapullo@unisa.it (A.C.)

**Supplementary Figure S1:** Loading scatter Plot at time 0 (A), time 1 (B), time 2 (C) with variables distributed in the plot according to the distribution of samples in the score scatter plot.

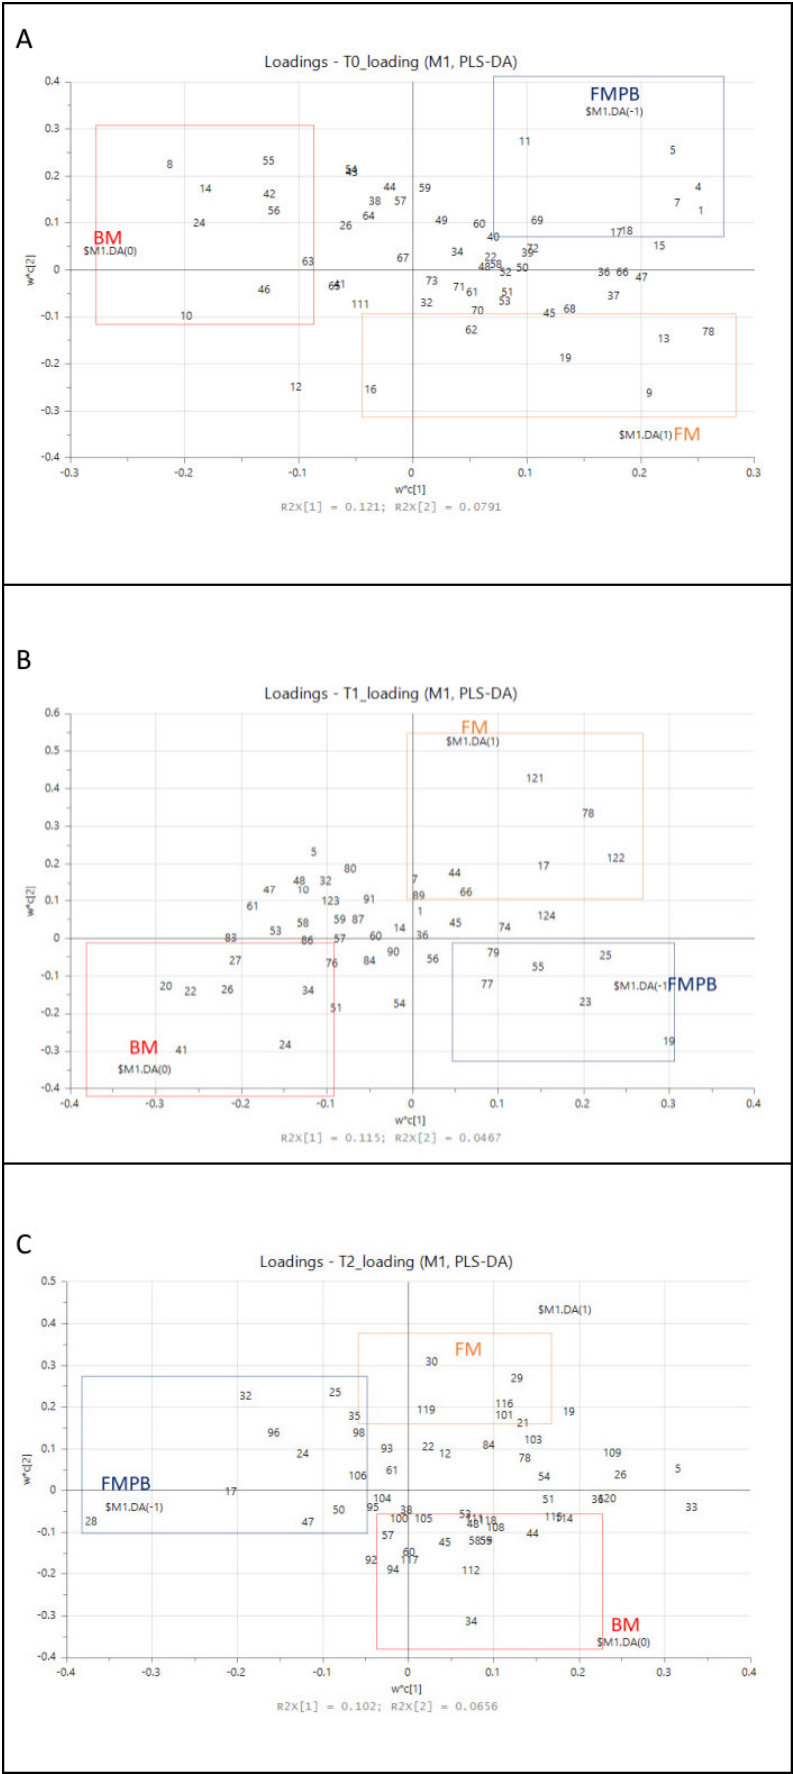

FMPB: Formula milk plus post biotic (text and rectangle blue); FM: formula milk (text and rectangle orange); BM: breast milk (text and rectangle red).

1 (Porphobilinogen); 4 (1-(beta-D-ribofuranosyl) thymine); 5 (Myristyl sulfate); 7 (L-alpha-lysophosphatidylcholine); 8 (N-Acetylgalactosamine 6-sulfate); 9 (Beta-Aspartylaspartic acid); 10 (4-Undecylbenzenesulfonic acid); 11 ((1S,2R)-1-(3,4-Dihydroxyphenyl)-7-hydroxy-N,N'-bis[2-(4-hydroxyphenyl)ethyl]-6-methoxy-1,2-dihydro-2,3-naphthalenedicarboxamide); 12 (2-Dodecylbenzenesulfonic acid); 13 (N~6~-[ (2R)-3,4-Dihydro-2H-pyrrol-2-ylcarbonyl]-L-lysine); 14 (17-Hydroxypregnenolone sulfate); 15 (Methyl (9E)-9-octadecenoate); 16 (1-oleoyl-sn-glycero-3-phospho-D-myoinositol); 17 (Leu-Leu); 18 (Pentadecanoic acid);

19 (3-Oxotetradecanoic acid); 20 (Taurohyocholic acid); 21 (Cholic acid), 22 (Hydroxycholic acid); 23 (Myristoleic acid); 24 (13(S)-HpOTrE); 25 (Homovanillic acid); 26 (15,16-DiHODE); 27 (3a,7a-Dihydroxycholanoic acid); 28 (Diethyl (2R,3R)-2-hydroxy-3-methylsuccinate); 29 (Reduced Glutathione); 30 (N-Acetyl-L-glutamic acid); 32 (Traumatic Acid); 33 (2-methoxyacetaminophen sulfate); 34 (Azelaic acid); 35 (N-Acetylglucosaminitol); 36 (Oleic acid); 37 (Oleoyl tyrosine);

38 (Phenylac-gln-OH); 39 (N-[(1S)-4-Carbamimidamido-1-carboxybutyl]asparaginy-beta-aspartyl-L-arginine); 40 (Leu-Val); 41 (Glycocholic acid); 42 (Glycoursodeoxycholic acid 3-sulfate); 43 (Glycochenodeoxycholic acid); 44 (Citric acid); 45 (D-Gluconic acid); 46 (D-Glucopyranuronic acid); 47 (5-Methoxy-3-indoleacetate);

48 (Sebacic acid); 49 (3-oxopalmitic acid); 50 (3-Hydroxysebacic acid); 51 (13S-hydroxyoctadecadienoic acid); 52 (Pinellic acid); 53 ((10E,15Z)-9,12,13-Trihydroxy-10,15-octadecadienoic acid); 54 (Palmitelaidic acid); 55 (Palmitic Acid); 56 (Traumatin); 57 (Phloionolic acid);

58 (12-HSA); 59 (9,10-Dihydroxystearic acid); 60 (Stearic acid); 61 (Myristic acid); 62 (Dimethyl (2E)-3-methoxy-4-oxo-5-[(8E,11E)-8,11,14-pentadecatrien-1-yl]-2-hexenedioate); 63 (Estriol); 64 (Androsterone sulfate); 65 (16alpha-hydroxydehydroepiandrosterone 3-sulfate); 66 (2-methoxy-17beta-estradiol 3-sulfate); 67 (Dehydroepiandrosterone sulfate);

68 (Tiliacorine); 69 (O-heptadecanoylcarnitine); 70 (Carbazepine); 71 (Soyasaponin I); 72 (Tomelukast); 73 (N(4)-phosphoagmatine); 74 (N-Stearoyltyrosine); 76 (Diethyl tartrate); 77 (2-methylcitric acid);

78 (laurilsulfate); 79 (1,1'-monoglyceride citrate); 80 (1-stearyl estercitric acid); 83 (Juniperic acid); 84 (6-Hydroxy-5-methyl-4,11-dioxoundecanoic acid); 86 (1-linoleoyl-sn-glycero-3-phosphoethanolamine); 87 (1-Glyceryl stearate);

89 (phyllanthin); 90 (Pirsidomine); 91 (Omacetaxine mepesuccinate); 92 (L-gamma-Glutamyl-L-leucine); 93 (Fructoselysine); 94 (N-tert-Butyloxycarbonyl-deacetyl-leupeptin); 95 (3-Hydroxyhexadecanoylcarnitine); 96 (4-(Trimethylammonio)-3-(undecanoyloxy)butanoate);

98 (7-ketodeoxycholic acid); 100 (Glucoheptonic Acid); 101 (5-Dibutyl 2-deoxy-3-C-(methoxycarbonyl)pentarate); 103 (Ascorbyl stearate); 104 (10,16-Dihydroxyhexadecanoic acid); 105 (7-Mercaptoheptanoylthreonine); 106 (1-Stearoyl-2-hydroxy-sn-glycero-3-PE);

108 (Patrinolide); 109 (Rehmanolide C); 111 (Glucopyranosyloxyjasmonic acid); 112 ((2-Hydroxy-2-oxido-1,3,2-dioxaphospholan-4-yl)methyl palmitate); 114 (1,3-Dihydroxy-2-propenyl (9Z)-9-tetradecenoate); 115 (Istamycin B3); 116 (Bafilomycin A1); 117 (Eriogonolide B);

118 (Precorrin-5); 119 (Ubiquinol 10); 120 (D-Pantothenic acid); 121 (3-Hydroxy carbofuran); 122 (9,10-Epoxyoctadecanoic acid); 123 (1,3-Dimethyluric acid); 124 (dibutyl decanedioate)

**Supplementary Table S1:** Common metabolites (T0) among the different diet regimens (Formula milk plus Post biotics (FMPB); Breast Milk (BM); Formula Milk (FM)) grouped based on their belonging class.

| Metabolites                                                                   | FMPB            | BM              | FM             |
|-------------------------------------------------------------------------------|-----------------|-----------------|----------------|
|                                                                               | Median (25-75)  | Median (25-75)  | Median (25-75) |
| <i>Amminoacids and derivatives</i>                                            |                 |                 |                |
| Oleoyl tyrosine                                                               | 0.3 (0.3-0.3)   | 0.3 (0.3-1.4)   | 0.3 (0.3-0.3)  |
| Phenylac-gln-OH                                                               | 2.95 (0.3-6.45) | 0.3 (0.3-5.38)  | 0.3 (0.3-6.25) |
| N-[(1S)-4-Carbamimidamido-1-carboxybutyl]asparaginyL-beta-aspartyl-L-arginine | 4.4 (1.9-5.8)   | 4.1 (2.15-5.2)  | 3.6 (0.3-5)    |
| Leu-Val                                                                       | 0.3 (0.3-4.88)  | 0.3 (0.3-2.05)  | 0.3 (0.3-1.85) |
| <i>Bile acid and derivatives</i>                                              |                 |                 |                |
| 11 <sup>2</sup> -Hydroxycholic acid                                           | 0.3 (0.3-5.88)  | 2.45 (0.3-4.65) | 0.3 (0.3-4.65) |
| Glycocholic acid                                                              | 0.3 (0.3-1.05)  | 0.3 (0.3-5.25)  | 0.3 (0.3-5.2)  |
| Glycoursodeoxycholic acid 3-sulfate                                           | 1 (0.3-4.78)    | 0.3 (0.3-0.3)   | 2.8 (0.3-6.4)  |
| Glycochenodeoxycholic acid                                                    | 2.75 (0.3-6.1)  | 0.3 (0.3-0.3)   | 0.3 (0.3-5.55) |
| <i>Organic acid</i>                                                           |                 |                 |                |
| Citric acid                                                                   | 5.5 (4.3-6.13)  | 5.3 (0.3-5.8)   | 5.4 (2.1-6.2)  |
| Traumatic Acid                                                                | 5 (2.3-5.25)    | 5 (3.7-5.4)     | 5 (3.35-5.4)   |
| D-Gluconic acid                                                               | 5.65 (0.3-6.03) | 5.4 (5-5.45)    | 5.4 (0.3-6)    |
| D-Glucopyranuronic acid                                                       | 0.3 (0.3-5.58)  | 0.3 (0.3-6.5)   | 6.1 (0.3-6.15) |
| 5-Methoxy-3-indoleacetate                                                     | 2.9 (0.3-5.88)  | 0.3 (0.3-6.25)  | 0.3 (0.3-0.3)  |
| <i>Fatty acid and derivatives</i>                                             |                 |                 |                |
| Azelaic acid                                                                  | 5.65 (3.9-6.6)  | 5.35 (4.2-6.2)  | 5.8 (4.1-6.2)  |
| Sebacic acid                                                                  | 4.3 (4.1-5.25)  | 4.6 (3.78-6.2)  | 4.1 (4-5.95)   |
| 15,16-DiHODE                                                                  | 5.2 (3.28-5.28) | 4.1 (2.2-4.78)  | 4.7 (3.6-5.7)  |
| 3-oxopalmitic acid                                                            | 4.8 (1.95-4.9)  | 2.05 (0.3-4.8)  | 3.3 (0.3-5.3)  |
| 3-Hydroxysebacic acid                                                         | 5.6 (5.35-6.1)  | 5.6 (5.05-6.03) | 5.8 (4.3-6.1)  |
| 13S-hydroxyoctadecadienoic acid                                               | 2.4 (2.03-5)    | 3.45 (1.68-5.2) | 2.4 (1.4-4.55) |
| Pinellic acid                                                                 | 3.7 (3.65-5.2)  | 4.15 (2.57-5.5) | 3.9 (0.3-5.2)  |
| (10E,15Z)-9,12,13-Trihydroxy-10,15-octadecadienoic acid                       | 2.1 (0.3-4.03)  | 2.3 (1.8-3.68)  | 2 (0.3-3.9)    |
| 3-Oxotetradecanoic acid                                                       | 0.3 (0.3-4.6)   | 2.9 (0.3-6.2)   | 0.3 (0.3-2.75) |
| Palmitelaidic acid                                                            | 5.1 (4.28-5.45) | 3.15 (0.3-5.6)  | 4.8 (3.6-5.55) |
| Palmitic Acid                                                                 | 5 (3.9-5.4)     | 2.1 (0.3-5.2)   | 5 (3.6-5.6)    |
| Traumatol                                                                     | 5 (0.3-5.7)     | 3.7 (0.3-4.35)  | 5.2 (3.6-5.6)  |
| 13(S)-HpOTrE                                                                  | 2.15 (0.3-5.1)  | 1.1 (0.3-4.5)   | 4.5 (2.15-5.5) |
| Oleic acid                                                                    | 5.8 (5.5-6.6)   | 6 (5.5-7)       | 5.8 (5.5-5.8)  |

|                                                                                              |                  |                 |                |
|----------------------------------------------------------------------------------------------|------------------|-----------------|----------------|
| <b>Phloionolic acid</b>                                                                      | 5 (2.55-5.83)    | 3.6 (1.8-5)     | 4.6 (2.65-5.5) |
| <b>12-HSA</b>                                                                                | 5.45 (1.93-6.4)  | 5.45 (2.85-6.2) | 4.3 (0.4-6.2)  |
| <b>9,10-Dihydroxystearic acid</b>                                                            | 3.3 (1.28-4.05)  | 0.3 (0.3-2.08)  | 1.8 (0.3-3.6)  |
| <b>Stearic acid</b>                                                                          | 5.8 (4.3-5.8)    | 5.1 (4.3-5.8)   | 4.7 (4.3-5.8)  |
| <b>Myristic acid</b>                                                                         | 5.3 (4.25-6.03)  | 5.7 (4.9-6.35)  | 5.8 (5.2-6.2)  |
| <b>Dimethyl (2E)-3-methoxy-4-oxo-5-[(8E,11E)-8,11,14-pentadecatrien-1-yl]-2-hexenedioate</b> | 0.3 (0.3-5.63)   | 5.3 (1.65-5.65) | 0.3 (0.3-6.3)  |
| <i>Steroids</i>                                                                              |                  |                 |                |
| <b>Estriol</b>                                                                               | 0.3 (0.3-1.7)    | 0.3 (0.3-1.7)   | 0.3 (0.3-6.5)  |
| <b>Androsterone sulfate</b>                                                                  | 4.8 (0.3-5.8)    | 0.3 (0.3-4.9)   | 4.8 (0.3-5.7)  |
| <b>16alpha-hydroxydehydroepiandrosterone 3-sulfate</b>                                       | 0.3 (0.3-1.63)   | 0.3 (0.3-3.6)   | 0.3 (0.3-4.8)  |
| <b>2-methoxy-17beta-estradiol 3-sulfate</b>                                                  | 4.95 (3.53-6.03) | 4.8 (2.45-6.5)  | 3.3 (0.5-5.2)  |
| <b>Dehydroepiandrosterone sulfate</b>                                                        | 3.15 (0.3-5.2)   | 2 (0.3-5.2)     | 3.3 (0.3-5.3)  |
| <i>Other organic compounds</i>                                                               |                  |                 |                |
| <b>Tiliacorine</b>                                                                           | 5.6 (0.3-6.2)    | 6 (3.3-6.23)    | 4.3 (0.3-5.8)  |
| <b>O-heptadecanoylcarnitine</b>                                                              | 0.3 (0.3-5.7)    | 0.3 (0.3-0.3)   | 0.3 (0.3-0.3)  |
| <b>Carbazeran</b>                                                                            | 5.6 (5.1-5.8)    | 5.6 (5.4-5.8)   | 5.6 (4.8-5.9)  |
| <b>Soyasaponin I</b>                                                                         | 0.3 (0.3-0.3)    | 0.3 (0.3-0.3)   | 0.3 (0.3-0.3)  |
| <b>Tomelukast</b>                                                                            | 5.1 (5-5.25)     | 5 (3.68-5.45)   | 5 (2.95-5.3)   |
| <b>N(4)-phosphoagmatine</b>                                                                  | 5.6 (4.6-6.4)    | 6.3 (4.25-6.7)  | 6.2 (5.8-6.6)  |

Data are expressed as peak rating.

**Supplementary Table S2:** Common metabolites (T1) among the different diet regimens (Formula milk plus Post biotics (FMPB); Breast Milk (BM); Formula Milk (FM)) grouped based on their belonging class.

| Metabolites                                             | FMPB           | FM              | BM             |
|---------------------------------------------------------|----------------|-----------------|----------------|
|                                                         | Median (25-75) | Median (25-75)  | Median (25-75) |
| <i>Ammiinoacids and derivatives</i>                     |                |                 |                |
| N-Stearoyltyrosine                                      | 0.3 (0.3-0.3)  | 0.3 (0.3-0.3)   | 0.3 (0.3-0.3)  |
| Leu-Leu                                                 | 3.9 (0.3-5.2)  | 0.6 (0.3-4.85)  | 4.3 (0.9-5.1)  |
| Leu-Asn                                                 | 0.3 (0.3-3.9)  | 0.3 (0.3-5.65)  | 0.3 (0.3-1.6)  |
| <i>Organic acid</i>                                     |                |                 |                |
| Diethyl tartrate                                        | 0.3 (0.3-0.3)  | 0.3 (0.3-5.2)   | 0.3 (0.3-0.3)  |
| 2-methylcitric acid                                     | 0.3 (0.3-6)    | 0.3 (0.3-5.5)   | 0.3 (0.3-0.3)  |
| Citric acid                                             | 5.6 (0.3-6.4)  | 2.9 (0.3-6.4)   | 5.8 (0.3-6.1)  |
| D-Gluconic acid                                         | 5.2 (0.3-6.1)  | 4 (0.3-6.05)    | 4.6 (0.3-5.8)  |
| laurilsulfate                                           | 4.3 (4.3-4.7)  | 0.3 (0.3-4.7)   | 4.7 (4.3-6.2)  |
| porphobilinogen                                         | 0.3 (0.3-0.3)  | 0.3 (0.3-0.4)   | 0.3 (0.3-2.7)  |
| Undecylbenzenesulfonic acid                             | 0.3 (0.3-2)    | 2.2 (0.3-3.75)  | 2 (0.3-3.6)    |
| 1,1'-monoglyceride citrate                              | 0.3 (0.3-6.6)  | 0.3 (0.3-5.6)   | 0.3 (0.3-5.2)  |
| <i>Fatty acids and derivatives</i>                      |                |                 |                |
| 1-stearyl estercitric acid                              | 0.3 (0.3-0.3)  | 0.3 (0.3-2)     | 0.3 (0.3-4.3)  |
| Traumatic Acid                                          | 0.3 (0.3-0.3)  | 0.3 (0.3-5.15)  | 0.3 (0.3-6)    |
| Azelaic acid                                            | 0.3 (0.3-4.8)  | 4.35 (0.3-6.6)  | 0.3 (0.3-6.2)  |
| Sebacic acid                                            | 0.5 (0.3-3.5)  | 3.05 (0.7-4.3)  | 2 (0.3-5.6)    |
| 9,10-Epoxy stearic acid                                 | 5.2 (3.9-5.5)  | 5.35 (5.1-5.8)  | 3.9 (0.3-5.5)  |
| Dibutyl sebacate                                        | 2 (0.3-5)      | 0.3 (0.3-3.15)  | 0.3 (0.3-2.4)  |
| 13S-hydroxyoctadecadienoic acid                         | 2.2 (0.3-4.1)  | 3.15 (1.3-4.75) | 0.7 (0.3-4.3)  |
| (10E,15Z)-9,12,13-Trihydroxy-10,15-octadecadienoic acid | 0.3 (0.3-2)    | 4.45 (0.3-5.5)  | 3.5 (0.3-5)    |
| Palmitic Acid                                           | 0.3 (0.3-0.3)  | 0.3 (0.3-0.3)   | 0.3 (0.3-0.3)  |
| Palmitelaidic acid                                      | 4.8 (0.3-5.2)  | 3.7 (0.3-5.15)  | 0.3 (0.3-3)    |
| Traumatins                                              | 5 (3.3-6)      | 5.2 (1.85-6)    | 4.8 (2.2-5.6)  |

|                                                     |               |                |               |
|-----------------------------------------------------|---------------|----------------|---------------|
| <b>Oleic acid</b>                                   | 5.8 (4.3-5.8) | 5.65 (4-6)     | 5.8 (3.9-5.8) |
| <b>Juniperic acid</b>                               | 0.3 (0.3-0.3) | 0.3 (0.3-5.6)  | 0.3 (0.3-2.7) |
| <b>Phloionolic acid</b>                             | 5 (2.3-5.4)   | 4.75 (3.8-5.5) | 5.4 (4.5-5.8) |
| <b>6-Hydroxy-5-methyl-4,11-dioxoundecanoic acid</b> | 1.2 (0.3-4.8) | 4.3 (0.3-4.8)  | 0.3 (0.3-4.3) |
| <b>12-HSA</b>                                       | 0.3 (0.3-0.3) | 0.3 (0.3-6.2)  | 0.3 (0.3-4.7) |
| <b>9,10-Dihydroxystearic acid</b>                   | 0.3 (0.3-2)   | 2.2 (0.3-4.1)  | 1.1 (0.3-4.2) |
| <b>Stearic acid</b>                                 | 3.6 (0.3-3.9) | 4.3 (2.65-4.9) | 4.2 (1.7-5.5) |
| <b>Myristic acid</b>                                | 0.3 (0.3-0.3) | 0.3 (0.3-5.4)  | 0.3 (0.3-4.8) |
| <b>Myristyl sulfate</b>                             | 0.3 (0.3-0.3) | 0.3 (0.3-2.3)  | 0.3 (0.3-4.1) |
| <b>Glycerol trihexanoate</b>                        | 3.9 (0.3-5.6) | 3.05 (0.3-5.5) | 0.3 (0.3-4.8) |
| <b>L-alpha-lysophosphatidylcholine</b>              | 0.3 (0.3-0.3) | 0.3 (0.3-0.3)  | 0.3 (0.3-5.4) |
| <b>1-linoleoyl-sn-glycero-3-phosphoethanolamine</b> | 0.3 (0.3-0.3) | 0.3 (0.3-0.3)  | 0.3 (0.3-0.3) |
| <b>1-Glyceryl stearate</b>                          | 0.3 (0.3-0.3) | 0.3 (0.3-0.3)  | 0.3 (0.3-0.3) |
| <i>Steroids</i>                                     |               |                |               |
| <b>2-methoxy-17beta-estradiol 3-sulfate</b>         | 0.3 (0.3-0.3) | 0.3 (0.3-0.3)  | 0.3 (0.3-0.3) |
| <b>17-Hydroxypregnenolone sulfate</b>               | 3.9 (0.3-5.4) | 3.95 (0.3-5.3) | 4.1 (0.3-5.6) |
| <i>Other organic compounds</i>                      |               |                |               |
| <b>5-Methoxy-3-indoleacetate</b>                    | 0.3 (0.3-0.3) | 0.3 (0.3-2.5)  | 0.3 (0.3-0.3) |
| <b>phyllanthin</b>                                  | 0.3 (0.3-0.3) | 0.3 (0.3-0.3)  | 0.3 (0.3-6)   |
| <b>Pirsidomine</b>                                  | 5.2 (0.3-6)   | 4.15 (0.3-5.8) | 4.8 (0.3-5.8) |
| <b>Omacetaxine mepesuccinate</b>                    | 0.3 (0.3-0.3) | 0.3 (0.3-0.3)  | 0.3 (0.3-0.3) |

---

Data are expressed as peak rating.

**Supplementary Table S3:** Common metabolites (T2) among the different diet regimens (Formula milk plus Post biotics (FMPB); Breast Milk (BM); Formula Milk (FM)) grouped based on their belonging class.

| Metabolites                                               | FMPB            | FM              | BM               |
|-----------------------------------------------------------|-----------------|-----------------|------------------|
|                                                           | Median (25-75)  | Median (25-75)  | Median (25-75)   |
| <i>Aminoacids and derivatives</i>                         |                 |                 |                  |
| <b>L-gamma-Glutamyl-L-leucine</b>                         | 2.9 (0.3-4.55)  | 2.25 (0.75-3.8) | 0.3 (0.3-2.5)    |
| <b>Fructoselysine</b>                                     | 4.5 (0.3-5.5)   | 1.25 (0.3-4.9)  | 3.4 (0.3-5.5)    |
| <b>N-tert-Butyloxycarbonyl-deacetyl-leupeptin</b>         | 6 (5.65-6.2)    | 6.2 (5.8-6.4)   | 5.8 (5.8-6)      |
| <b>3-Hydroxyhexadecadienoylcarnitine</b>                  | 4.25 (0.3-5.35) | 1.8 (0.3-4.8)   | 0.3 (0.3-5.15)   |
| <b>4-(Trimethylammonio)-3-(undecanoyloxy)butanoate</b>    | 0.3 (0.3-4.1)   | 0.3 (0.3-0.3)   | 0.3 (0.3-0.3)    |
| <i>Bile acids and derivatives</i>                         |                 |                 |                  |
| <b>1<math>\beta</math>-Hydroxycholic acid</b>             | 1.2 (0.3-5)     | 0.3 (0.3-4.95)  | 4.05 (0.3-5)     |
| <b>7-ketodeoxycholic acid</b>                             | 6.2 (5.8-6.85)  | 6.15 (5.5-6.65) | 6.45 (5.8-6.6)   |
| <b>Cholic acid</b>                                        | 0.3 (0.3-5.35)  | 3.1 (0.3-5.6)   | 5.4 (4.4-5.65)   |
| <i>Organic acids</i>                                      |                 |                 |                  |
| <b>Citric acid</b>                                        | 5.35 (3-6.2)    | 5.9 (4.3-6.65)  | 5.15 (4.3-6.2)   |
| <b>Glucoheptonic Acid</b>                                 | 5.4 (4-6.3)     | 5.55 (4.75-5.8) | 4.95 (2.75-6.05) |
| <b>1,5-Dibutyl 2-deoxy-3-C-(methoxycarbonyl)pentarate</b> | 3.5 (2.75-4.9)  | 3.8 (2.7-4.8)   | 4.25 (3.7-5.2)   |
| <b>D-Gluconic acid</b>                                    | 5.5 (5-5.8)     | 5.9 (5.5-6.5)   | 5.7 (4.85-5.8)   |
| <b>5-Methoxy-3-indoleacetate</b>                          | 6.2 (6.15-6.6)  | 6.35 (0.3-7)    | 6 (0.3-6.6)      |
| <i>Fatty acid derivatives</i>                             |                 |                 |                  |
| <b>Sebacic acid</b>                                       | 4.3 (4.3-4.75)  | 4.3 (4.3-6.2)   | 4.3 (4.3-4.7)    |
| <b>9,10-Epoxystearic acid</b>                             | 5.5 (4.7-5.5)   | 5.5 (5.1-5.65)  | 5.5 (5.1-5.8)    |
| <b>Ascorbyl stearate</b>                                  | 3.8 (1.85-4.9)  | 4.8 (4.35-4.9)  | 4.7 (4.3-5.1)    |
| <b>Dibutyl sebacate</b>                                   | 5 (4-5.65)      | 5.5 (4.7-5.8)   | 5.65 (4.3-6.2)   |
| <b>10,16-Dihydroxyhexadecanoic acid</b>                   | 5.8 (4.55-6.35) | 5.35 (3.7-5.75) | 5.1 (3.4-5.65)   |
| <b>13S-hydroxyoctadecadienoic acid</b>                    | 5.1 (4.7-5.7)   | 5.5 (5.3-5.7)   | 5.5 (4.85-5.55)  |
| <b>3-Hydroxysebacic acid</b>                              | 6.05 (5.3-7.4)  | 6.05 (4.8-6.8)  | 4.8 (4.8-7.1)    |



|                                                                       |                  |                 |                  |
|-----------------------------------------------------------------------|------------------|-----------------|------------------|
| <b>7-Mercaptoheptanoylthreonine</b>                                   | 4.3 (0.3-5.65)   | 3.5 (0.3-6.25)  | 2.9 (0.3-4.35)   |
| <b>(10E,15Z)-9,12,13-Trihydroxy-10,15-octadecadienoic acid</b>        | 4.2 (2.7-5.3)    | 4.7 (3.45-5.5)  | 4.6 (2.9-5.5)    |
| <b>1-Stearoyl-2-hydroxy-sn-glycero-3-PE</b>                           | 5.4 (4.95-5.8)   | 5.2 (0.3-5.25)  | 5.2 (2-5.5)      |
| <b>Palmitic Acid</b>                                                  | 5.65 (5.5-6.6)   | 6 (5.8-6.6)     | 5.85 (5.5-6.2)   |
| <b>Palmitelaidic acid</b>                                             | 4.5 (2.95-5.35)  | 5.45 (4.6-5.55) | 5.3 (4.8-5.7)    |
| <b>13(S)-HpOTrE</b>                                                   | 4.25 (1.95-4.65) | 2.1 (1.1-2.25)  | 2 (1.85-4.5)     |
| <b>12-HSA</b>                                                         | 6.2 (5.25-6.4)   | 6.2 (5.75-7)    | 5.8 (4.5-7)      |
| <b>9,10-Dihydroxystearic acid</b>                                     | 5.65 (5.5-6.6)   | 6 (5.8-6.6)     | 5.85 (5.5-6.2)   |
| <b>Stearic acid</b>                                                   | 5.6 (4.6-5.7)    | 5.8 (4.95-5.8)  | 4.95 (4.4-5.35)  |
| <b>Myristic acid</b>                                                  | 5.5 (5.2-5.9)    | 5.7 (5.2-5.9)   | 5.8 (5.5-6.05)   |
| <i>Terpenes</i>                                                       |                  |                 |                  |
| <b>Patrinoside</b>                                                    | 4.6 (2.15-5.1)   | 5 (3.7-5.3)     | 4.9 (2-5)        |
| <b>Rehmaionoside C</b>                                                | 0.55 (0.3-5)     | 5 (2.5-5.2)     | 5 (4.25-5.2)     |
| <i>Other compounds</i>                                                |                  |                 |                  |
| <b>12-O-Î²-D-Glucopyranosyloxyjasmonic acid</b>                       | 0.3 (0.3-5.6)    | 2.4 (0.3-5.2)   | 0.3 (0.3-5.2)    |
| <b>(2-Hydroxy-2-oxido-1,3,2-dioxaphospholan-4-yl)methyl palmitate</b> | 0.3 (0.3-4.3)    | 1.9 (0.3-4.65)  | 0.3 (0.3-1.9)    |
| <b>2-Dodecylbenzenesulfonic acid</b>                                  | 3.2 (2.9-4.3)    | 3.7 (2.9-4.25)  | 4.1 (3.5-4.45)   |
| <b>3-Hydroxycarbofuran</b>                                            | 0.3 (0.3-1)      | 0.3 (0.3-5.2)   | 4.45 (0.3-6.15)  |
| <b>1,3-Dihydroxy-2-propanyl (9Z)-9-tetradecenoate</b>                 | 3.6 (0.3-5.1)    | 5.2 (4.55-5.4)  | 4.35 (3-5.15)    |
| <b>Istamycin B3</b>                                                   | 2 (1.3-3.75)     | 4 (2.2-5.2)     | 4.35 (1.5-5.2)   |
| <b>Bafilomycin A1</b>                                                 | 2.4 (1.9-5)      | 4 (1.7-5.5)     | 5.2 (3.6-6.2)    |
| <b>Phenylac-gln-OH</b>                                                | 5.7 (0.3-6.1)    | 4.95 (0.3-5.95) | 2.9 (0.3-6.1)    |
| <b>Eriojaposide B</b>                                                 | 4.2 (3-5.65)     | 4.5 (3.8-5.8)   | 3.85 (3.1-4.4)   |
| <b>Precorrin-5</b>                                                    | 0.3 (0.3-3.9)    | 2.1 (0.3-5.5)   | 0.3 (0.3-4.8)    |
| <b>Ubiquinol 10</b>                                                   | 2.9 (0.3-5.85)   | 0.3 (0.3-5.8)   | 5.35 (2.75-5.75) |
| <b>D-Pantothenic acid</b>                                             | 1.5 (0.3-5.8)    | 5.5 (5.4-5.6)   | 5.5 (2.85-5.8)   |

Data are expressed as peak rating.
